# Supplementary material for: Improved performance of Cr(vi)-reducing microbial fuel cells by nano-FeS hybridized biocathodes
Source: Royal Society of Chemistry journal article supplement (doi:10.1039/d3ra00683b), 2023-01-01
Supplement: d3ra00683b1.pdf [file d3ra00683b1.pdf]

# Supporting Information

## Improved performance of Cr(VI)-reducing microbial fuel cells by nano-FeS hybridized biocathodes

Xinglei Zhuang<sup>1</sup>, Shien Tang<sup>1</sup>, Weiliang Dong, Fengxue Xin, Honghua Jia, Xiayuan

Wu\*

College of Biotechnology and Pharmaceutical Engineering, Nanjing Tech University,  
Nanjing 211816, China

**\*Corresponding author:**

Xiayuan Wu

Nanjing Tech University, No.30 Puzhu Road(S), Nanjing, 211816, Jiangsu, P.R. China

**Tel./Fax:** +86 25 58139929

**E-mail:** wuxiayuan@njtech.edu.cn

<sup>1</sup>These authors contributed equally to the article.

FIGURES (3)

TABLES (4)

PAGES (8)

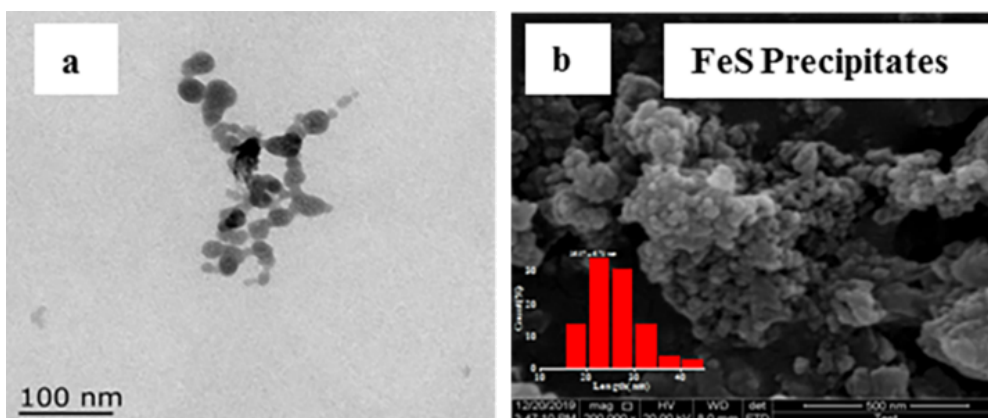

**Fig. S1** The TEM (a) and SEM (b) images of produced precipitates in the Fe+S MFC for electrode biofilm fabrication.

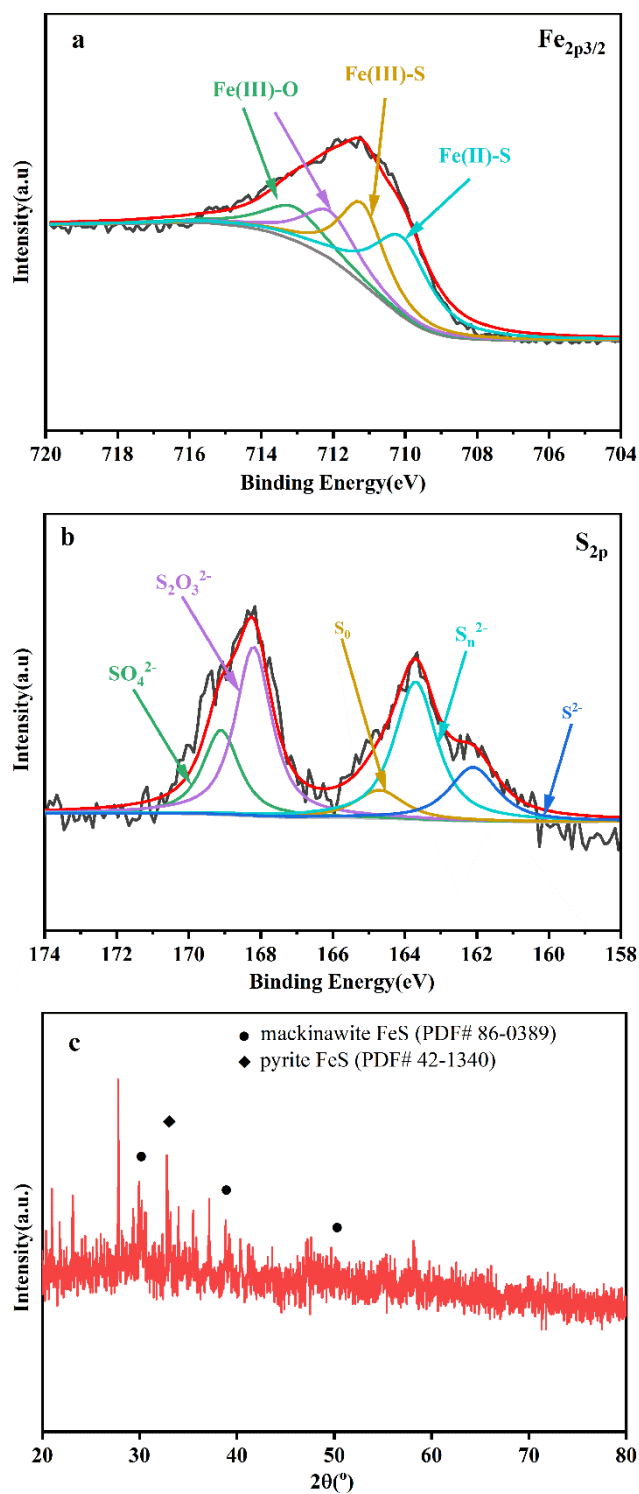

**Fig. S2** The XPS spectra (a:  $\text{Fe}_{2p_{3/2}}$ ; b:  $\text{S}_{2p}$ ) and XRD pattern (c) of produced precipitates in the Fe+S MFC for electrode biofilm fabrication.

**Table S1** The distribution (Wt%) of different valence Fe compounds.

| Group                 | FeS    | Fe <sub>2</sub> O <sub>3</sub> | FeS <sub>2</sub> | Fe <sub>3</sub> O <sub>4</sub> |
|-----------------------|--------|--------------------------------|------------------|--------------------------------|
| Before Cr(VI) removal | 32.53% | 21.69%                         | 42.91%           | 2.87%                          |
| After Cr(VI) removal  | 27.36% | 35.07%                         | 23.78%           | 13.79%                         |

**Table S2** Valence distribution (Wt%) of S element.

| Group                 | S(IV)  | S(0)   | S(-I)  | S(-II) |
|-----------------------|--------|--------|--------|--------|
| Before Cr(VI) removal | 24.15% | 32.15% | 31.33% | 12.37% |
| After Cr(VI) removal  | 63.16% | 26.11% | 8.12%  | 2.61%  |

**Table S3** Valence distribution (Wt%) of Cr element.

| Valence state of element | Wt(%)  |
|--------------------------|--------|
| Cr(VI)                   | 23.03% |
| Cr(III)                  | 69.68% |
| Cr(0)                    | 7.29%  |

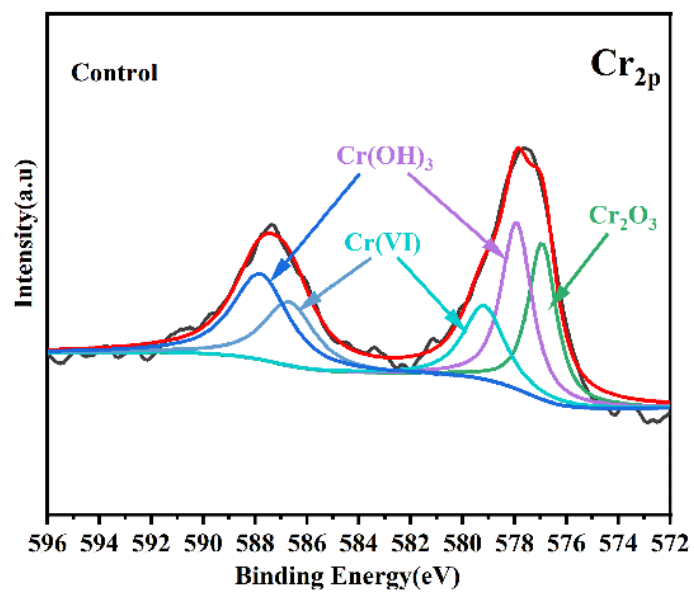

**Fig. S3** The XPS spectra of the Control electrode biofilm after Cr(VI) removal.

**Table S4** The  $\alpha$ -diversity indices of microbial community in different electrode biofilms after Cr(VI) removal.

| <b>Group</b>   | <b>OTU</b> | <b>ACE</b> | <b>Chao1</b> | <b>Shannon</b> | <b>Simpson</b> |
|----------------|------------|------------|--------------|----------------|----------------|
| <b>Control</b> | 254        | 404.1156   | 342.0286     | 3.0915         | 0.0802         |
| <b>Fe</b>      | 212        | 256.1966   | 255.3846     | 3.2939         | 0.0625         |
| <b>S</b>       | 171        | 225.6967   | 213.0000     | 1.7742         | 0.3478         |
| <b>Fe+S</b>    | 275        | 288.3727   | 288.5938     | 2.9606         | 0.1015         |
